# Supplementary material for: IKK2/NF-κB signaling protects neurons after traumatic brain injury
Source: PubMed Central journal article supplement — FASEB J. 2018 Jan 5;32(4):1916–32. doi: 10.1096/fj.201700826R (PMC5893169; doi:10.1096/fj.201700826r), 2018-01-05
Supplement: fj.201700826R.sf1.pdf [file fj.201700826R.sf1.pdf]

## Supplementary Figure 1

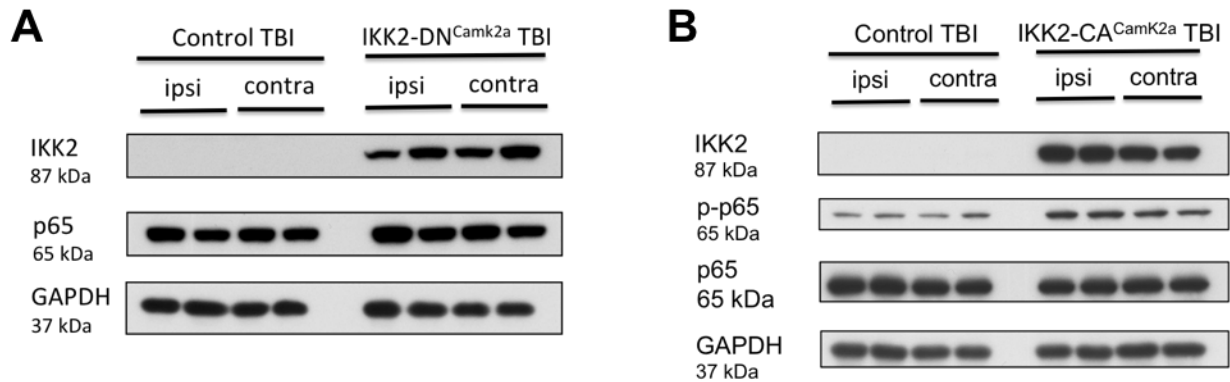**IKK2-DN and IKK2-CA transgene expression is not affected by TBI.**

(A) IKK2-DN transgene expression (hIKK2) was monitored by immunoblotting in the injured (ipsi) and uninjured (contra) hemisphere of control and IKK2-DN<sup>Camk2a</sup> mice 6h after head trauma. p65 levels were unchanged between the two animal groups. GAPDH is used as loading control (n=2).

(B) IKK2-CA transgene expression (hIKK2) was monitored by immunoblotting in the injured (ipsi) and uninjured (contra) hemisphere of control and IKK2-CA<sup>Camk2a</sup> mice 6h after head trauma. Phospho-p65 levels are elevated in the cortex of IKK2-CA<sup>Camk2a</sup> mice due to constitutive expression of IKK2 in forebrain neurons and thus enhanced p65 phosphorylation. Total p65 levels are unchanged between the two animal groups. GAPDH is used as loading control (n=2).
