# Supplementary material for: IKK2/NF-κB signaling protects neurons after traumatic brain injury
Source: PubMed Central journal article supplement — FASEB J. 2018 Jan 5;32(4):1916–32. doi: 10.1096/fj.201700826R (PMC5893169; doi:10.1096/fj.201700826r), 2018-01-05
Supplement: fj.201700826R.sf2.pdf [file fj.201700826R.sf2.pdf]

Mettang et al.  
**Supplementary Figure 2**

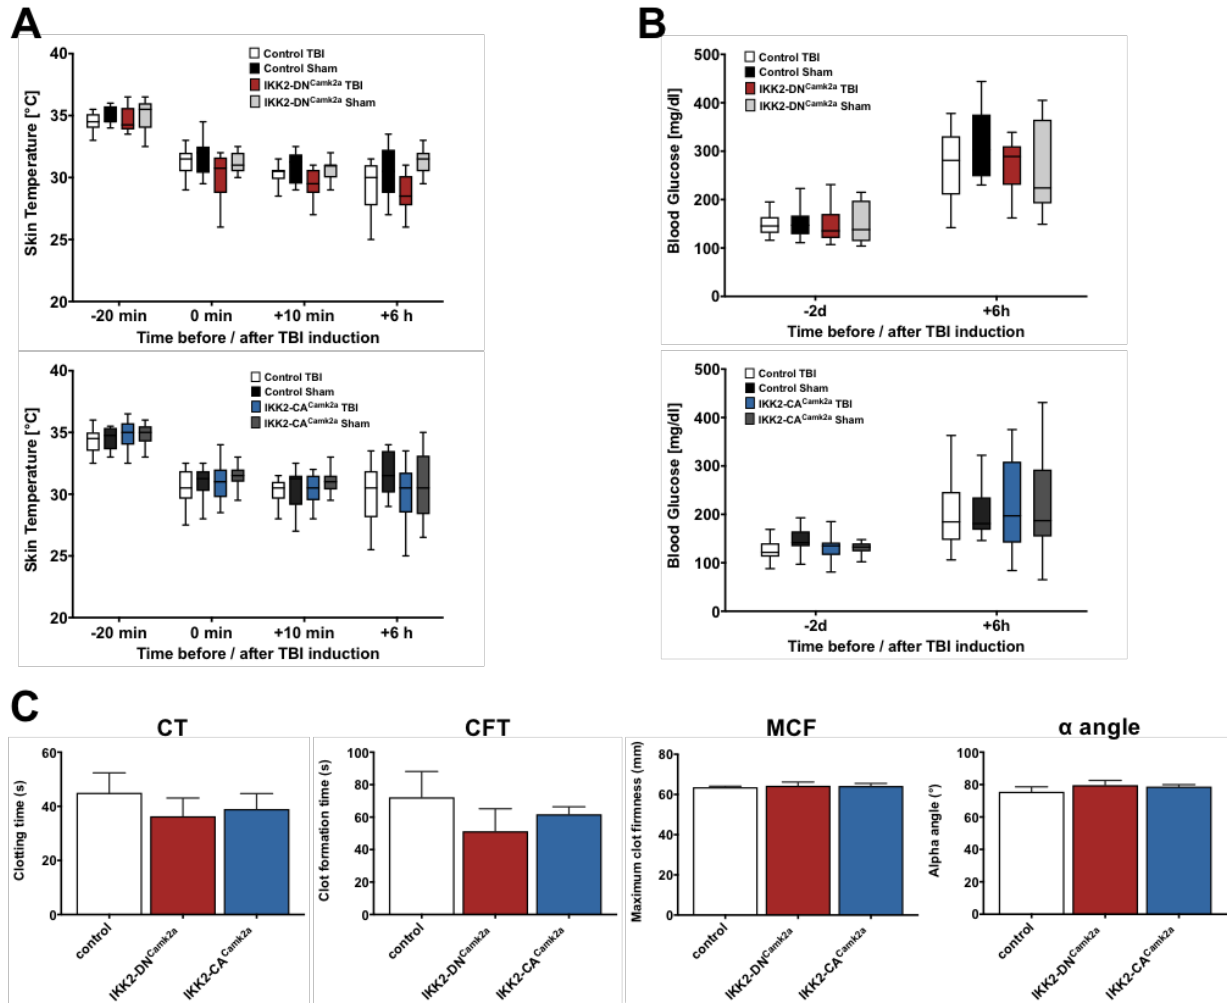

**Physiological parameters are not changed in control, IKK2-DN<sup>Camk2a</sup> and IKK2-CA<sup>Camk2a</sup> mice upon CHI.**

**(A)** Temperature monitoring of sham, control, IKK2-DN<sup>Camk2a</sup> (upper panel) and IKK2-CA<sup>Camk2a</sup> mice (lower panel) before TBI and at indicated times post-injury. All groups show a drop in body temperature after injury, mainly due to anesthetic effects. Box-plot with median ± interquartile range, whiskers show maximum range; statistical analysis: two-way ANOVA followed by Bonferroni's post test (n=10-25).

**(B)** Blood glucose measurement of sham, control TBI, IKK2-DN<sup>Camk2a</sup> (upper panel) and IKK2-CA<sup>Camk2a</sup> mice (lower panel) before TBI and at 6h post-injury. No difference between the indicated groups can be detected. Box-plot with median ± interquartile range, whiskers show maximum range; statistical analysis: two-way ANOVA followed by Bonferroni's post test (n = 10-25).

**(C)** Thromboelastometry measurements (ROTEM analysis) before TBI indicate no difference in clot formation between control, IKK2-DN<sup>Camk2a</sup> and IKK2-CA<sup>Camk2a</sup> animals, shown by clotting time (CT), clot formation time (CFT), maximum clot firmness (MCF) and  $\alpha$ -angle. All values are presented as mean ± SEM (n=3-5). Statistical analysis was calculated by 1-way-ANOVA followed by Bonferroni's post test.
