# Supplementary material for: IKK2/NF-κB signaling protects neurons after traumatic brain injury
Source: PubMed Central journal article supplement — FASEB J. 2018 Jan 5;32(4):1916–32. doi: 10.1096/fj.201700826R (PMC5893169; doi:10.1096/fj.201700826r), 2018-01-05
Supplement: fj.201700826R.sf3.pdf [file fj.201700826R.sf3.pdf]

Mettang et al.

### Supplementary Figure 3

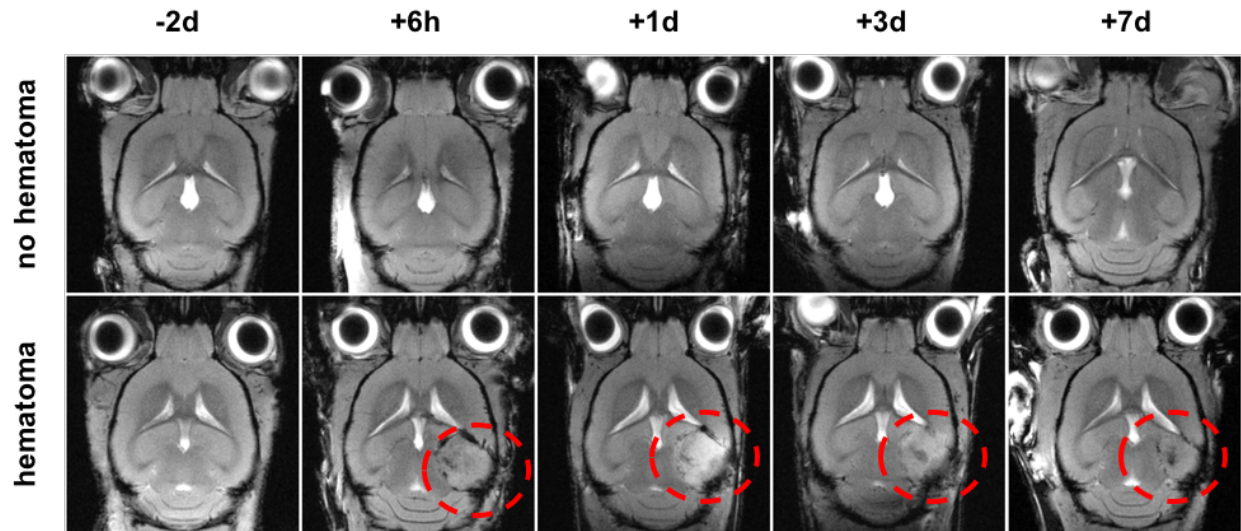

#### Longitudinal MRI analysis after TBI.

Hematoma formation shown in representative coronal T1\*-weighted MRI images at indicated time points post TBI. The red dashed line indicates the trauma impact region comprising hematoma and edema.
