# Supplementary material for: IKK2/NF-κB signaling protects neurons after traumatic brain injury
Source: PubMed Central journal article supplement — FASEB J. 2018 Jan 5;32(4):1916–32. doi: 10.1096/fj.201700826R (PMC5893169; doi:10.1096/fj.201700826r), 2018-01-05
Supplement: fj.201700826R.sf4.pdf [file fj.201700826R.sf4.pdf]

Mettang et al.  
Supplementary Figure 4

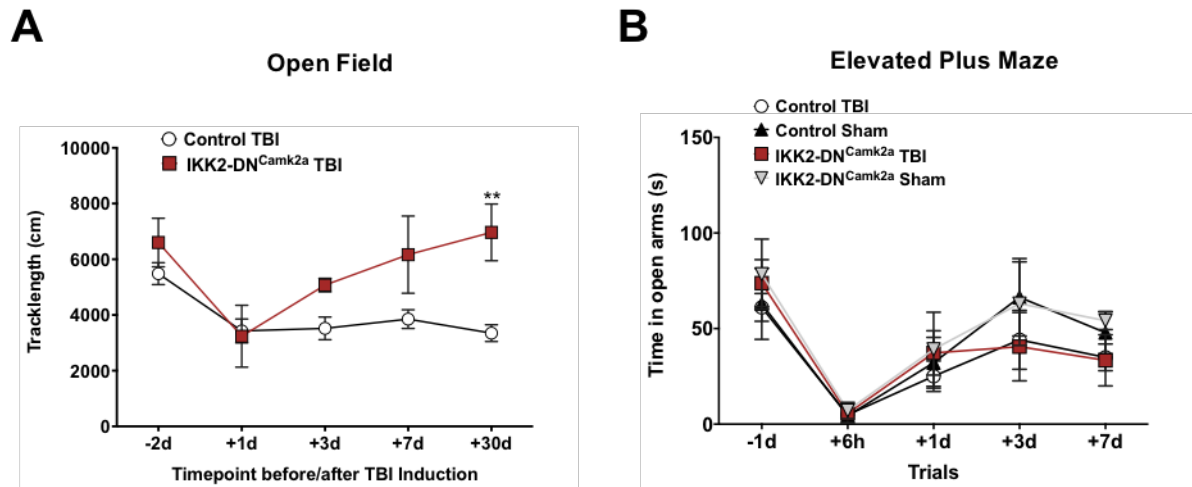

**Characterization of anxiety-like behaviors of IKK2-DN<sup>Camk2a</sup> mice post TBI.**

(A) Open field (OF) test shows that IKK2-DN<sup>Camk2a</sup> mice develop a hyperactive phenotype 30d post TBI, as these mice traveled significantly longer distances compared to control littermates. Diagrams show mean  $\pm$  SEM, statistical analysis: 2-way-ANOVA followed by Bonferroni's post test (n=4-9), \*\*p < 0.01.

(B) Elevated plus maze (EPM) test shows that TBI animals spent less time exploring the open arms than sham animals 3 and 7d post TBI, however no difference between the genotypes can be seen. Diagram shows mean  $\pm$  SEM, statistical analysis: 2-way-ANOVA followed by Bonferroni's post test (n=3-6).
