# Supplementary material for: IKK2/NF-κB signaling protects neurons after traumatic brain injury
Source: PubMed Central journal article supplement — FASEB J. 2018 Jan 5;32(4):1916–32. doi: 10.1096/fj.201700826R (PMC5893169; doi:10.1096/fj.201700826r), 2018-01-05
Supplement: fj.201700826R.sf6.pdf [file fj.201700826R.sf6.pdf]

Mettang et al.  
**Supplementary Figure 6**

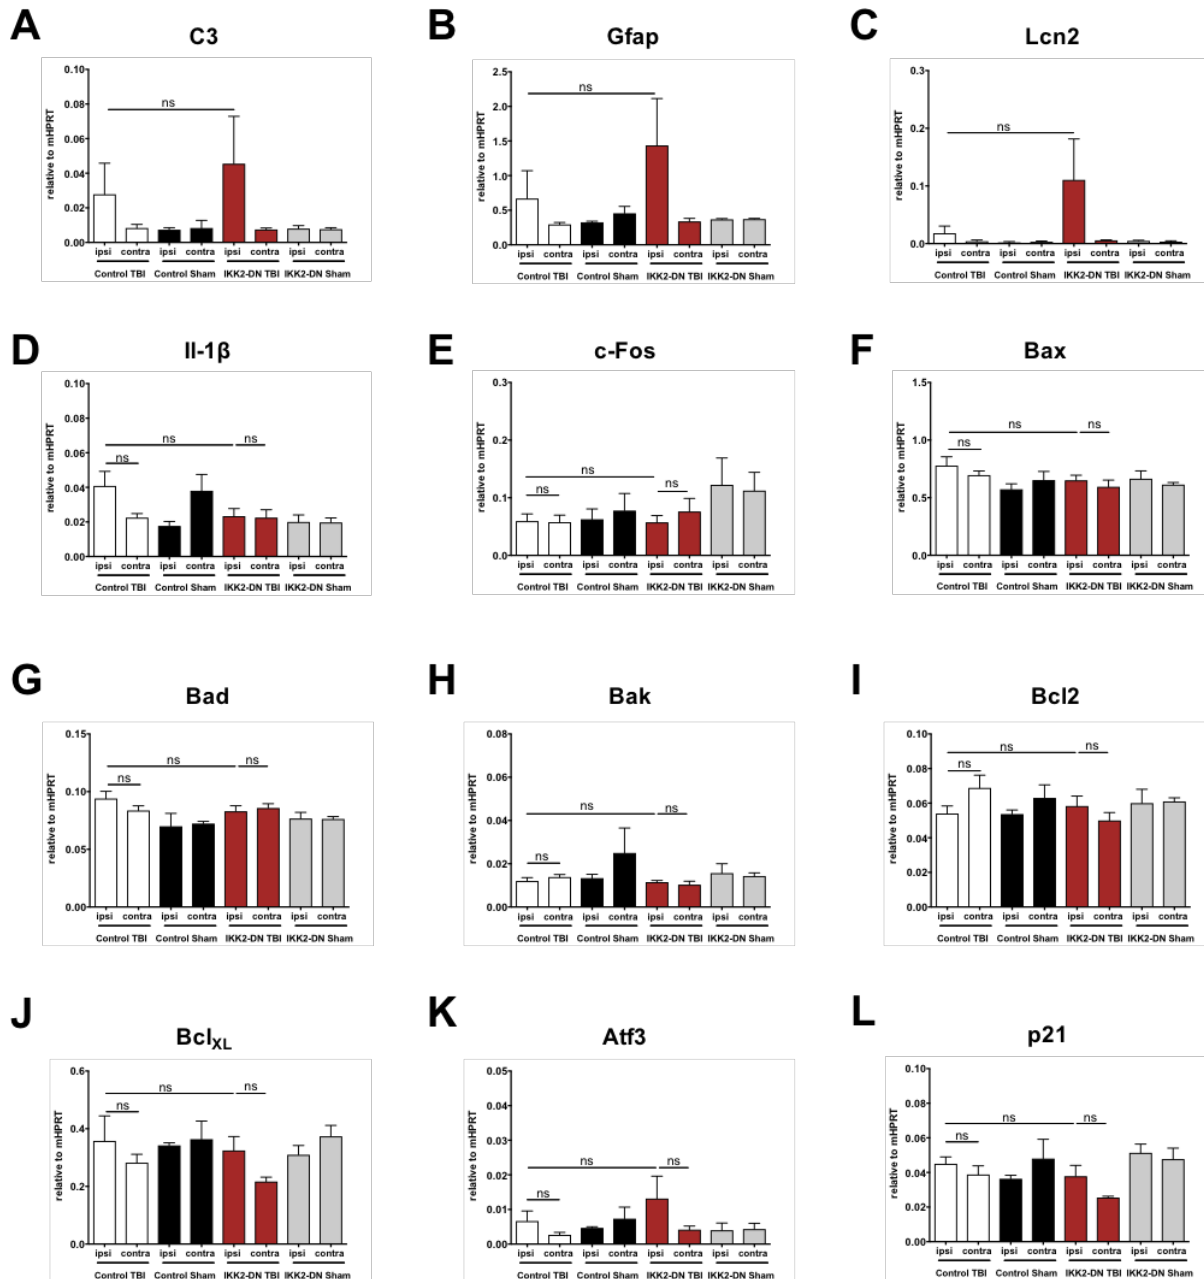

**Expression of neuroinflammatory and apoptotic factors in the cortex of IKK2-DN<sup>Camk2a</sup> mice in the late post-traumatic phase.**

7d after closed head trauma no difference in the expression of neuroinflammatory and apoptotic markers can be detected between control and IKK2-DN<sup>Camk2a</sup> mice. This is indicated by qPCR analysis for *C3* (A), *Gfap* (B), *Lcn2* (C), *Il-1β* (D), *c-Fos* (E), *Bax* (F), *Bad* (G), *Bak* (H), *Bcl2* (I), *Bcl<sub>XL</sub>* (J), *Atf3* (K) and *p21* (L). Expression levels measured by qPCR are presented relative to *Hprt* (mean ± SEM). ns: not significant ( $p > 0.05$ ) calculated by 1-way-ANOVA followed by Bonferroni's post test ( $n = 3-6$ ).
