# Supplementary material for: IKK2/NF-κB signaling protects neurons after traumatic brain injury
Source: PubMed Central journal article supplement — FASEB J. 2018 Jan 5;32(4):1916–32. doi: 10.1096/fj.201700826R (PMC5893169; doi:10.1096/fj.201700826r), 2018-01-05
Supplement: fj.201700826R.sf7.pdf [file fj.201700826R.sf7.pdf]

Mettang et al.  
Supplementary Figure 7

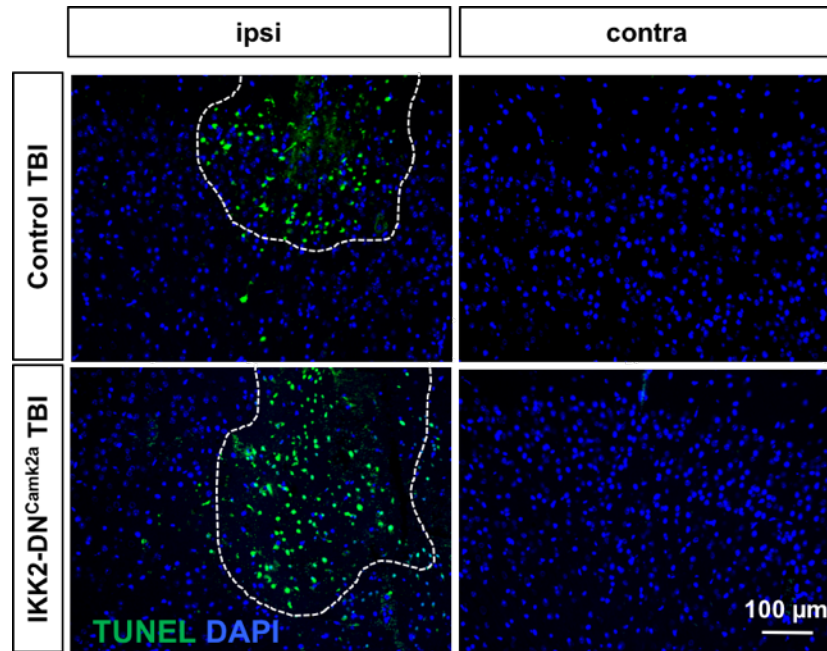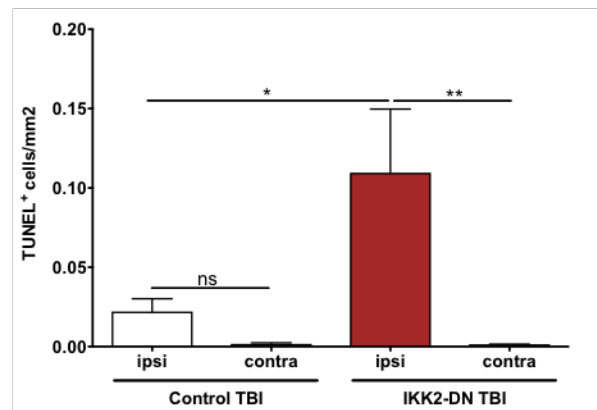

**Cell death is enhanced in the injured brain hemispheres of IKK2-DN<sup>Camk2a</sup> mice 3d after CHI.**

Immunofluorescent staining and quantification of TUNEL<sup>+</sup> cells reveal significantly enhanced apoptosis in the ipsilateral cortex of IKK2-DN<sup>Camk2a</sup> mice compared to control animals. Scale bar 100  $\mu$ m. \* $p$  < 0.05; \*\* $p$  < 0.01; ns: not significant ( $p$ >0.05) according to 1-way ANOVA with Bonferroni correction (Control TBI  $n$ =5, IKK2-DN<sup>Camk2a</sup> TBI  $n$ =3).
